# Supplementary material
Source: PubMed Central journal article supplement (PMC4103689)

## **SUPPLEMENTAL MATERIAL**

**Supplemental Table 1. Sociodemographic and clinical characteristics of patients in enrolled from more aggressive vs. less aggressive hospitals**

|                                      | <b>More Aggressive<br/>Hospitals n=2116</b> | <b>Less Aggressive<br/>Hospitals n=2155</b> | <b>P-Value</b> |
|--------------------------------------|---------------------------------------------|---------------------------------------------|----------------|
| <b>Sociodemographics</b>             |                                             |                                             |                |
| Age (years)                          | 59.3 ± 12.3                                 | 58.7 ± 12.3                                 | 0.161          |
| Male sex                             | 67.3%                                       | 66.4%                                       | 0.514          |
| Caucasian race                       | 77.0%                                       | 58.1%                                       | <0.001         |
| Married                              | 57.8%                                       | 47.4%                                       | <0.001         |
| Low social support                   | 13.4%                                       | 21.0%                                       | <0.001         |
| Lives alone                          | 22.2%                                       | 27.0%                                       | <0.001         |
| High school education                | 90.5%                                       | 87.7%                                       | 0.003          |
| Avoids care due to cost              | 22.5%                                       | 28.7%                                       | <0.001         |
| <b>Comorbidities</b>                 |                                             |                                             |                |
| Hypertension                         | 64.1%                                       | 69.1%                                       | <0.001         |
| Prior CABG                           | 12.0%                                       | 10.4%                                       | 0.105          |
| Diabetes mellitus                    | 28.4%                                       | 33.0%                                       | 0.001          |
| Current smoking                      | 59.5%                                       | 59.7%                                       | 0.932          |
| Chronic lung disease                 | 5.7%                                        | 8.6%                                        | <0.001         |
| Prior heart failure                  | 6.1%                                        | 10.7%                                       | <0.001         |
| Chronic kidney disease*              | 26.6%                                       | 22.7%                                       | 0.004          |
| Body mass index (kg/m <sup>2</sup> ) | 29.3 ± 6.3                                  | 29.8 ± 6.6                                  | 0.023          |
| Prior Stroke                         | 5.1%                                        | 4.7%                                        | 0.574          |
| Depressive symptoms                  | 8.7%                                        | 6.7%                                        | 0.014          |
| <b>Hospital procedures</b>           |                                             |                                             |                |
| Cardiac catheterization              | 94.8%                                       | 89.9%                                       | <0.001         |
| Angioplasty                          | 70.8%                                       | 60.0%                                       | <0.001         |
| Bypass graft surgery                 | 10.0%                                       | 8.4%                                        | 0.067          |
| <b>Clinical presentation</b>         |                                             |                                             |                |
| ST-elevations                        | 49.2%                                       | 37.3%                                       | <0.001         |
| Peak Troponin (ng/mL)                | 31.2 ± 78.8                                 | 25.8 ± 67.2                                 | 0.018          |
| GRACE risk score                     | 99.7 ± 30.2                                 | 101.0 ± 29.8                                | 0.155          |
| Ejection fraction (%)                | 49.0 ± 12.3                                 | 48.4 ± 13.9                                 | 0.155          |
| Initial heart rate (bpm)             | 81.7 ± 22.3                                 | 83.6 ± 21.8                                 | 0.004          |
| Initial systolic BP (mmHg)           | 143.5 ± 30.3                                | 143.2 ± 30.2                                | 0.749          |
| Length of stay (days)                | 5.1 ± 5.7                                   | 5.7 ± 6.4                                   | 0.004          |

\*Estimated glomerular filtration rate <60mL/min/1.73m<sup>2</sup>

**Supplemental Table 2. Patient factors associated with higher likelihood of statin initiation, intensification, and maximization**

|                                           | <u>Initiation</u>       |              | <u>Intensification</u>  |              | <u>Maximization</u>     |                  |
|-------------------------------------------|-------------------------|--------------|-------------------------|--------------|-------------------------|------------------|
|                                           | RR (95% CI)             | p-value      | RR (95% CI)             | p-value      | RR (95% CI)             | p-value          |
| Male                                      | <b>1.04 (1.01-1.07)</b> | <b>0.017</b> | 1.02 (0.85-1.22)        | 0.837        | <b>1.15 (1.01-1.30)</b> | <b>0.029</b>     |
| Age (per 10 years)                        | Non-linear              |              | 0.99 (0.88-1.12)        | 0.851        | <b>0.94 (0.90-1.00)</b> | <b>0.034</b>     |
| Caucasian                                 | <b>0.96 (0.94-0.99)</b> | <b>0.003</b> | 0.79 (0.62-1.01)        | 0.063        | 1.05 (0.94-1.16)        | 0.396            |
| Married                                   | 1.01 (0.98-1.04)        | 0.558        | 1.14 (0.89-1.45)        | 0.297        | 1.09 (1.00-1.18)        | 0.046            |
| Low social support                        | 0.98 (0.94-1.03)        | 0.498        | 0.79 (0.55-1.15)        | 0.225        | 0.99 (0.88-1.12)        | 0.918            |
| High school or greater education          | <b>0.95 (0.91-0.98)</b> | <b>0.006</b> | 1.12 (0.94-1.33)        | 0.215        | <b>1.14 (1.02-1.27)</b> | <b>0.017</b>     |
| Avoids care due to cost                   | 1.03 (1.00-1.06)        | 0.052        | 1.24 (0.98-1.57)        | 0.071        | 0.99 (0.88-1.12)        | 0.871            |
| Hypertension                              | 0.98 (0.96-1.00)        | 0.066        | 1.06 (0.89-1.28)        | 0.499        | 1.01 (0.89-1.14)        | 0.906            |
| Prior bypass surgery                      | 0.94 (0.87-1.03)        | 0.189        | 0.74 (0.54-1.02)        | 0.067        | 1.03 (0.84-1.27)        | 0.786            |
| Prior PCI                                 | 0.99 (0.94-1.04)        | 0.663        | 0.93 (0.75-1.17)        | 0.553        | 1.12 (0.97-1.27)        | 0.127            |
| Prior myocardial infarction               | 0.97 (0.93-1.02)        | 0.238        | 0.82 (0.59-1.16)        | 0.260        | 0.98 (0.85-1.14)        | 0.812            |
| Diabetes mellitus                         | 0.96 (0.93-1.00)        | 0.055        | 0.94 (0.80-1.11)        | 0.485        | <b>1.14 (1.01-1.28)</b> | <b>0.031</b>     |
| Current/former smoking                    | 1.00 (0.98-1.03)        | 0.992        | 0.86 (0.71-1.03)        | 0.107        | 0.93 (0.85-1.01)        | 0.090            |
| Chronic lung disease                      | 0.93 (0.86-1.02)        | 0.111        | 1.19 (0.93-1.53)        | 0.174        | 0.92 (0.81-1.04)        | 0.190            |
| Prior heart failure                       | <b>0.94 (0.88-1.00)</b> | <b>0.040</b> | <b>0.72 (0.52-0.99)</b> | <b>0.042</b> | 0.84 (0.67-1.06)        | 0.140            |
| Chronic kidney disease                    | 0.95 (0.89-1.01)        | 0.097        | 0.93 (0.63-1.39)        | 0.738        | <b>0.86 (0.74-1.00)</b> | <b>0.048</b>     |
| Cerebrovascular disease                   | 1.01 (0.95-1.08)        | 0.721        | 0.99 (0.81-1.20)        | 0.891        | 1.02 (0.84-1.24)        | 0.859            |
| Depression                                | 1.01 (0.96-1.05)        | 0.737        | 1.14 (0.91-1.43)        | 0.261        | 1.05 (0.89-1.23)        | 0.551            |
| Body mass index (per 5kg/m <sup>2</sup> ) | 0.99 (0.98-1.01)        | 0.424        | 0.98 (0.90-1.06)        | 0.541        | 1.03 (0.99-1.06)        | 0.170            |
| ST-elevation AMI                          | 1.02 (0.99-1.05)        | 0.169        | <b>1.47 (1.12-1.92)</b> | <b>0.006</b> | <b>1.49 (1.25-1.77)</b> | <b>&lt;0.001</b> |
| LDL-C assessed during AMI                 | 1.00 (0.90-1.11)        | 0.962        | 0.71 (0.36-1.39)        | 0.316        | 0.79 (0.57-1.08)        | 0.141            |
| LDL-C level                               | Non-linear              |              | Non-linear              |              | Non-linear              |                  |

PCI, percutaneous coronary intervention; LDL-C, low-density lipoprotein cholesterol

**Supplemental Figure 1. Association of in-hospital LDL-C levels and risk of statin initiation (a), intensification (b), and maximization (c)**

**a.**

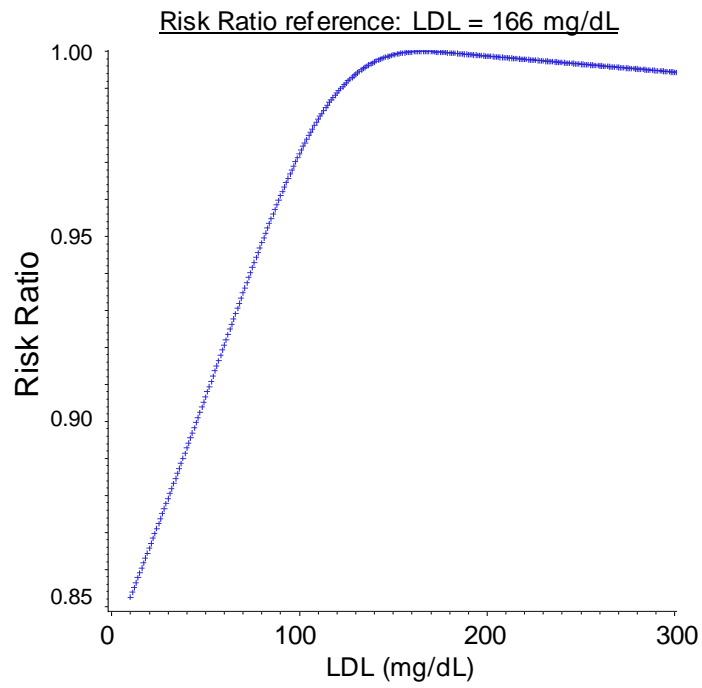

**b.**

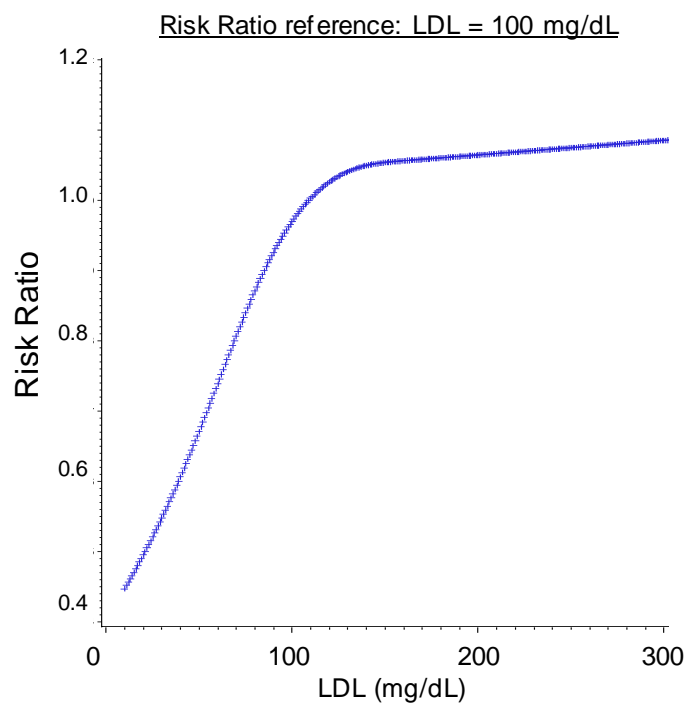

c.

Risk Ratio reference: LDL = 100 mg/dL

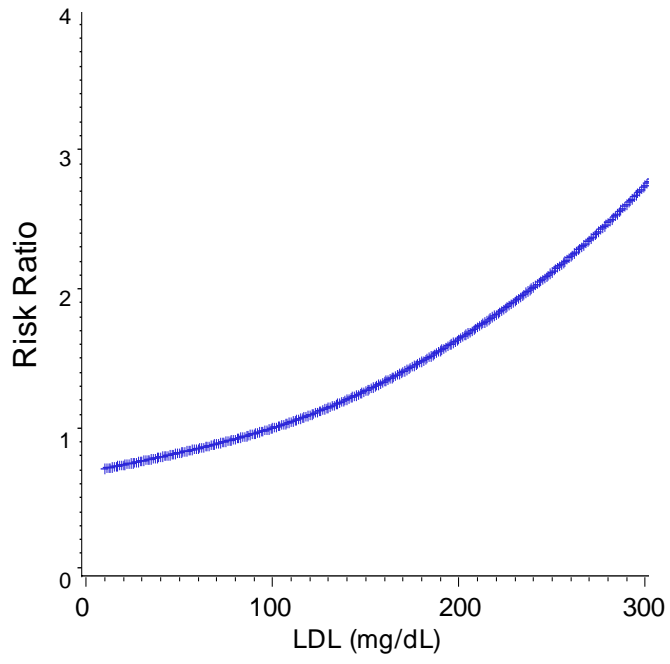

Supplement: NIHMS559229-supplement-Supplemental_Material.pdf [file NIHMS559229-supplement-Supplemental_Material.pdf]
